# Supplementary material for: Non-inferiority double-blind randomised controlled trial comparing gabapentin versus tramadol for the treatment of chronic neuropathic or mixed pain in children and adolescents: the GABA-1 trial—a study protocol
Source: PubMed Central journal article supplement — BMJ Open. 2019 Feb 20;9(2):e023296. doi: 10.1136/bmjopen-2018-023296 (PMC6398794; doi:10.1136/bmjopen-2018-023296), 2019-02-20
Supplement: bmjopen-2018-023296supp002.pdf [file bmjopen-2018-023296supp002.pdf]

## **Appendix 2.**

List of genetic, metabolic and neurodegenerative diseases associated with neuropathic pain.

1. Charcot-Marie-Tooth disease
2. Fabry disease
3. Primary erythromelalgia
4. Mitochondrial disorders
5. Lead and mercury intoxication
6. Leukodystrophy
7. Lysosomal disorders (Metachromatic leukodystrophy , Krabbe disorder)
8. Acute stroke of basal ganglia
9. Long fat acid disorders
10. INAD (iron neuropathy axonal dystrophy)
11. Fat Acid Oxidation disorders
